# Supplementary material
Source: PubMed Central journal article supplement (PMC17285)

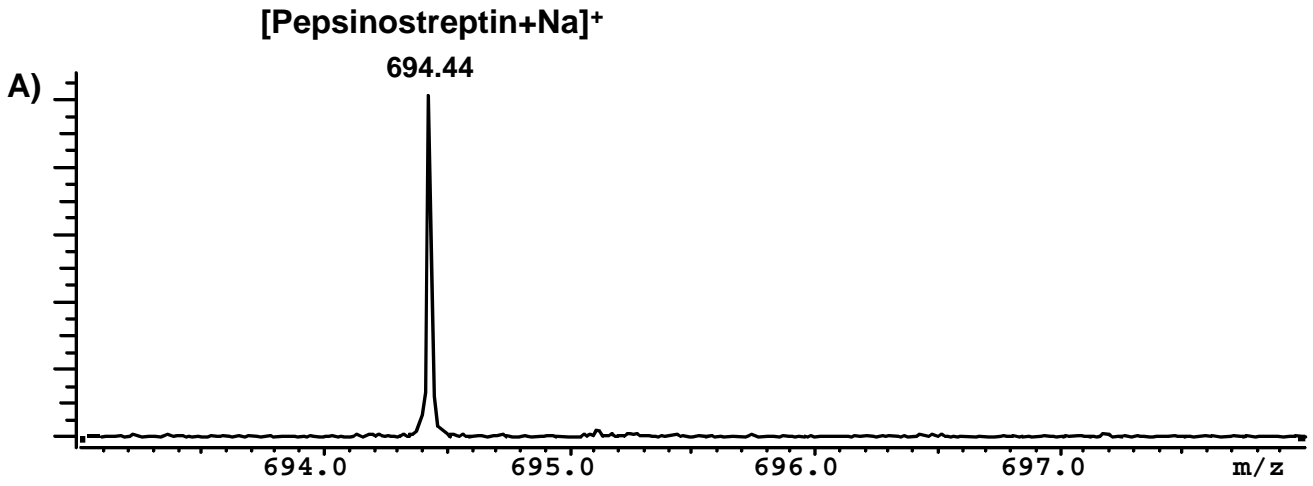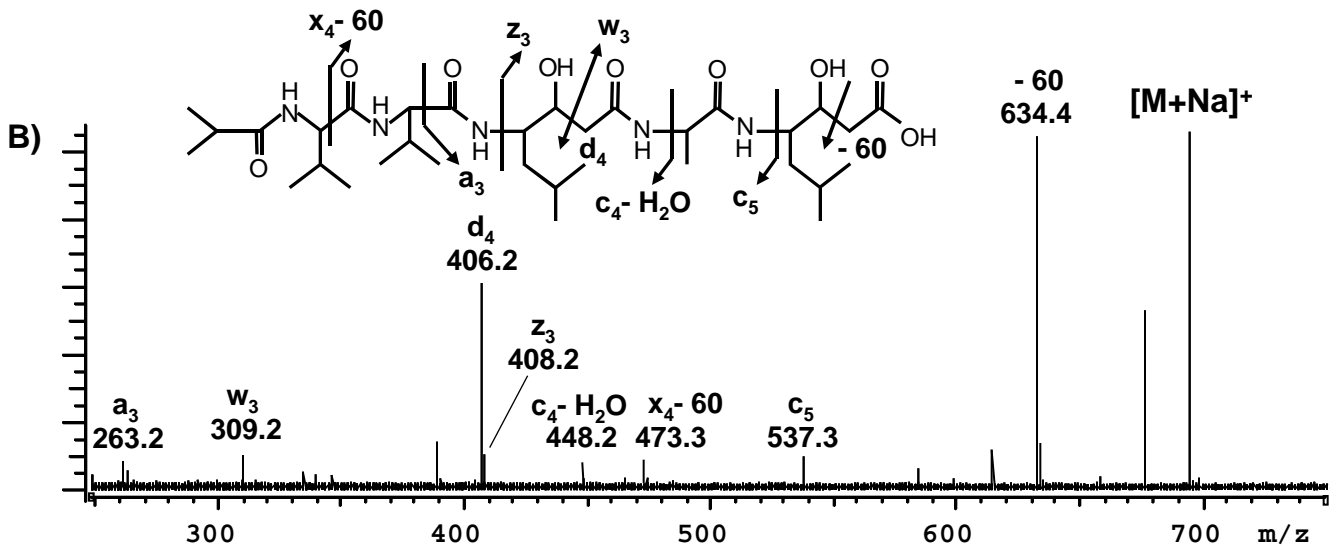

Supplement: pnas_220403997_2.pdf [file pnas_220403997_2.pdf]
